# Supplementary material for: Computational peptide discovery with a genetic programming approach
Source: J Comput Aided Mol Des. 2024 Apr 3;38(1):17. doi: 10.1007/s10822-024-00558-0 (PMC11416381; doi:10.1007/s10822-024-00558-0)
Supplement: Supplementary file 3 — (xlsx 13 KB) [file 10822_2024_558_MOESM3_ESM.xlsx]

## Sheet: Table S1
Peptide	# of cycles	PoetRegex Score	# of AA	Mass (mg)	MW (g/mole)	Nominal concentration (mM)	MTR_asym (%)	*MTR_asym, (nominal) concentration-normalized	Relative to K12
KKKKKKKKKKKK	Gold Standard		12	4.6	1556.09	4.87006	10.51	2.15808	1
QSCKLKKLQSLK	1000	94.39	12	4	1403.74	4.69445	6.51	1.38674	0.64
QSLKQSIKKLKK		92.52	12	4	1428.77	4.63128	5.72	1.23508	0.57
QSLKSWIEKLKK		92.59	12	4.2	1487.79	4.55319	7.2	1.58131	0.73
ICKLDKRIKKLK	100	80.52	12	4.3	1485.93	4.67498	8.96	1.91659	0.89
QSVQDKLKKRII		77.18	12	4.2	1455.75	4.73746	4.36	0.920325	0.43
QDGSKKSLKSCK		74.55	12	4.2	1308.51	5.14384	17.59	3.41962	1.58
LFHDIEKQLKHA	10	43.79	12	4.9	1478.70	5.04372	7.01	1.38985	0.64
TQHEVQSEKRGW		41.87	12	4.9	1484.58	5.12515	9.86	1.92385	0.89
SEVEKPFWEQDK		39.91	12	4.7	1521.63	4.70136	6.14	1.30601	0.61
Table S1 - Experimental results of 9 synthesized peptides and K12
